# Supplementary material for: Geranylgeraniol and Neurological Impairment: Involvement of Apoptosis and Mitochondrial Morphology
Source: MDPI journal article supplement (doi:10.3390/ijms17030365), 2016-03-11
Supplement: s1 [file s1]

# Supplementary Materials: Geranylgeraniol and Neurological Impairment: Involvement of Apoptosis and Mitochondrial Morphology

Annalisa Marcuzzi, Elisa Piscianz, Marina Zweyer, Roberta Bortul, Claudia Loganes, Martina Girardelli, Gabriele Baj, Lorenzo Monasta and Claudio Celeghini

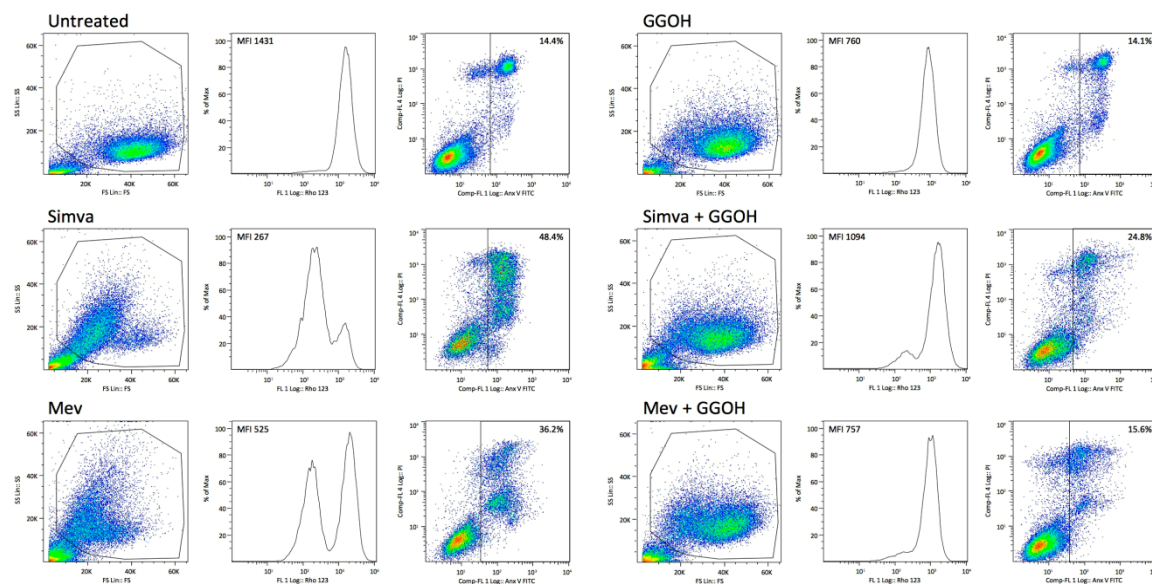

**Figure S1.** Representative flow cytometry graphs of Daoy cells treated with 48 h in complete medium with Simvastatin (10 $\mu$ M) and Mevalonate (10 mM) in the presence or absence of GGOH (50  $\mu$ M) for 24 h. The graphs show the Mean Fluorescent Intensity (MFI) of Rhodamine 123 and the percentage of Annexin V positive cells after the treatments.

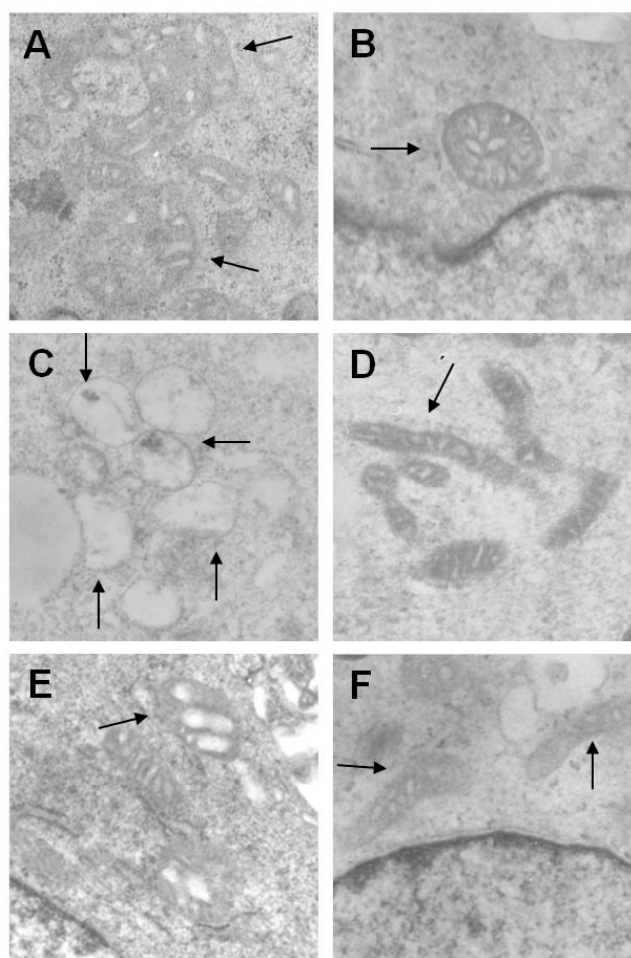

**Figure S2.** Representative electron micrographs of Daoy cells incubated for 48 h in complete medium with Simvastatin (10  $\mu$ M) and Mevalonate (10 mM) in the presence or absence of GGOH (50  $\mu$ M) for 24 h. Each picture show an enlargement of normal or damaged mitochondria (indicated by arrow). (A) untreated condition; (B) GGOH treatment; (C) Simvastatin treatment; (D) Simvastatin + GGOH treatment; (E) Mevalonate treatment; (F) Mevalonate + GGOH treatment.
